# Supplementary material
Source: Research Square preprint supplement (doi:10.21203/rs.3.rs-10042816/v1)
Supplement: Supplementary file 1 [file 4b6f3131f3c7188e5499f03e.docx]

Key Highlights

1.AI-driven system delivers personalized exercise prescriptions in junior PE classes.

2.Learning analytics dashboards guide teachers’ formative instruction adjustments weekly.

3.Intervention improves total PE scores and item-specific fitness outcomes.

4.Lower baseline students benefit most from AI-supported personalized exercise plans.

5.Platform usage logs link prescription completion and report views to performance gains.
